# Supplementary material for: Analysis of Human Gut Microbiota Composition Associated to the Presence of Commensal and Pathogen Microorganisms in Côte d’Ivoire
Source: MDPI journal article supplement (doi:10.3390/microorganisms9081763), 2021-08-18
Supplement: s1 [file s1]

**Table S5A.** Beta diversity analysis for *Entamoeba* spp. presence.

| Group                                                        | Family              | Median [min-max]        | p_value |
|--------------------------------------------------------------|---------------------|-------------------------|---------|
| negative                                                     | Bacteroidaceae      | 0.00425 [0-0.5432]      | 0.0444  |
| <i>En. coli</i> ,  <i>En. dispar</i>  , <i>En. hartmanni</i> |                     | 0.00125 [ 0-0.01]       |         |
| negative                                                     | Christensenellaceae | 0.0015 [0-0.058 ]       | 0.0046  |
| <i>En. coli</i> ,  <i>En. dispar</i>  , <i>En. hartmanni</i> |                     | 0.01175 [ 0-0.0932]     |         |
| negative                                                     | Lachnospiraceae     | 0.1255 [0.0065-0.7335 ] | 0.0390  |
| <i>En. coli</i> ,  <i>En. dispar</i>  , <i>En. hartmanni</i> |                     | 0.0855 [0.014-0.2075 ]  |         |
| negative                                                     | Rikenellaceae       | 0.00325 [ 0-0.0537]     | 0.0180  |
| <i>En. coli</i> ,  <i>En. dispar</i>  , <i>En. hartmanni</i> |                     | 0.01 [ 0-0.223]         |         |
| negative                                                     | Ruminococcaceae     | 0.2385 [0.001-0.8527 ]  | 0.0358  |
| <i>En. coli</i> ,  <i>En. dispar</i>  , <i>En. hartmanni</i> |                     | 0.405 [ 0.05-0.912]     |         |

Family comparison in >1 year age subjects: negative (34 subjects) versus *En. coli*|*En. dispar*|*En. a hartmanni* positive (33 subjects). Only families producing a statistically significant difference ( $p < 0.05$ ) were indicated.

**Table S5B.** Beta diversity analysis for *Entamoeba* spp. presence.

| Group                                                                                                                | Genus                                | Median [min-max]  | p_value |
|----------------------------------------------------------------------------------------------------------------------|--------------------------------------|-------------------|---------|
| negative                                                                                                             | <i>Bacteroides</i>                   | 0.042 [0-0.5432]  | 0.044   |
| <i>En. coli</i>   <i>En. dispar</i>   <i>En. hartmanni</i>                                                           |                                      | 0.0012 [0-0.01]   |         |
| negative                                                                                                             | <i>Christensenellaceae</i> R-7 group | 0.0005 [0-0.041]  | 0.0094  |
| <i>En. coli</i>   <i>En. dispar</i>   <i>En. hartmanni</i>                                                           |                                      | 0.0117 [0-0.0902] |         |
| negative                                                                                                             | <i>Rikenellaceae</i> RC9 gut group   | 0 [0-0.0197]      | 0.0076  |
| <i>E. coli</i>   <i>E. dispar</i>   <i>E. hartmanni</i>                                                              |                                      | 0.0087 [0-0.2222] |         |
| negative                                                                                                             | <i>Ruminococcaceae</i> UCG-002       | 0.0152 [0-0.685]  | 0.0009  |
| <i>E. coli</i>   <i>E. dispar</i>   <i>E. hartmanni</i><br><i>E. coli</i>   <i>E. dispar</i>   <i>E. hartmanni</i> i |                                      | 0.154 [0-0.8272]  |         |
| negative                                                                                                             | <i>Ruminococcaceae</i> UCG-010       | 0.0002 [0-0.013]  | 0.0012  |
| <i>E. coli</i>   <i>E. dispar</i>   <i>E. hartmanni</i>                                                              |                                      | 0.008 [0-0.0997]  |         |

Genus comparison in >1 year age subjects: negative (34 subjects) versus *En. coli*|*En. dispar*|*En. hartmanni* positive (33 subjects). Only Genera producing a statistically significant difference ( $p < 0.05$  or  $p < 0.001$ ) were indicated.

**Table S5C.** Comparison of *E. hartmanni* groups: Beta diversity at genus level.

| Genus                                | Groups (n)       | Control          | <i>E. hartmanni</i> + <i>Blastocystis</i> | <i>E. hartmanni</i> + <i>Blastocystis</i> |
|--------------------------------------|------------------|------------------|-------------------------------------------|-------------------------------------------|
|                                      | Median [min-max] | group (8)        | group (11)                                | +Pathogen group (9)                       |
| <i>Alloprevotella</i>                |                  | 0 [0-0]**        | 0[0-0.11]                                 | 0 [0-0.01]                                |
| <i>Bifidobacterium</i>               |                  | 0 [0-0.12]       | 0 [0-0.01]                                | 00[0.01-0.36]§                            |
| <i>Christensenellaceae</i> R-7 group |                  | 0 [0-0.01]       | 0.01[0-0.07]°                             | 0.01[0-0.06]                              |
| <i>Faecalibacterium</i>              |                  | 0.18 [0.04-0.57] | 0.06[0.02-0.28]°°                         | 0.03[0.01-0.14]                           |
| <i>Rikenellaceae</i> RC9 gut group   |                  | 0 [0-0]*         | 0.02[0-0.22]                              | 0[0-0.04]                                 |
| <i>Ruminococcaceae</i> UCG-002       |                  | 0 [0.01-0.08]*   | 0.11[0-0.40]°°                            | 0.21[0.01-0.43]                           |
| <i>Succinivibrio</i>                 |                  | 0 [0-0]*         | 0.02[0-0.08]                              | 0[0-0.43]                                 |

Control group versus Group of subjects positive for *E. hartmanni* and *Blastocystis* . and versus Group of subjects positive for *E. hartmanni*+*Blastocystis* group versus *E. hartmanni*+*Blastocystis*; ° means  $p < 0.05$  and °° means  $p < 0.01$  Control group versus *E. hartmanni* and *Blastocystis* and Pathogen; § means  $p < 0.05$  *E. hartmanni* and *Blastocystis* and other pathogens.

\* means  $p < 0.05$  and \*\* means  $p < 0.01$  Control versus *E. hartmanni* and *Blastocystis* and Pathogen (Kruskal-Wallis test).

**Table S5D.** Beta diversity analysis for *Entamoeba* spp. detection

| Group | Family                    | Median [min-max]     | 1E versus 3E | 2E versus 3E |
|-------|---------------------------|----------------------|--------------|--------------|
| 1E    | Bacteroidaceae            | 0.0057 [0.002-0.223] | 0.0312       | 0.0417       |
| 2E    |                           | 0.0034 [0-0.5432]    |              |              |
| 3E    |                           | 0.0002 [0-0.004]     |              |              |
| 1E    | Bacteroidales S24-7 group | 0 [0-0.0095]         | 0.0335       | >0.05        |
| 2E    |                           | 0.001 [0-0.1615]     |              |              |
| 3E    |                           | 0.01 [0-0.043]       |              |              |

Family comparison in >1 year age subjects: 1E = Control group (8 negative subjects), 2E= not harboring *Entamoeba* species (20 subjects), 3E= carrying *En. coli* (10 subjects). Only comparisons producing a statistically significant difference ( $p < 0.05$ ) were indicated. Only groups and Families producing a statistically significant difference were indicated.

**Table S5E.** Beta diversity analysis for *Entamoeba* spp. presence.

| Genus (n)                                | 1E<br>Median [min-max]    | 2E<br>Median [min-max]          | 3E<br>Median [min-max] | 5E<br>Median [min-max] |
|------------------------------------------|---------------------------|---------------------------------|------------------------|------------------------|
| [ <i>Ruminococcus</i> ]<br>torques group | 0.0031 [0-0.0517]         | 0.0029 [0-0.0038]*              | 0.0004 [0-0.0022]      | 0.0027 [0.001-0.0042]  |
| <i>Bacteroides</i>                       | 0.0057 [0.0002-0.223]*    | 0.0034 [0-0.5432]*              | 0.0002 [0-0.004]       | 0.0025 [0-0.01]        |
| <i>Lachnoclostridium</i>                 | 0.0025 [0.0007-0.0702]**  | 0.002 [0-0.1667]**              | 0 [0-0.0007]           | 0.0012 [0-0.006]       |
| <i>Ruminococcaceae</i><br>UCG-002        | 0.0116 [0.0005-0.082]     | 0.15.61 [0-0.0151] <sup>§</sup> | 0.1352 [0-0.8272]      | 0.214 [0.0007-0.4325]  |
| <i>Ruminococcaceae</i><br>UCG-010        | 0 [0-0.001] <sup>§§</sup> | 0.0038 [0-0.013] <sup>§</sup>   | 0.01 [0-0.0607]        | 0.0112 [0.0007-0.072]  |

Genus comparison in >1 year age subjects: Group 1E: control group (8 negative subjects); Group: 2E: 20 positive for pathogens not including *Entamoeba* spp.; Group 3E: 10 subjects positive for *En. coli* and other pathogens; Group 5E:9 subjects positive for *En. hartmanni* and other pathogens. Only groups and Genera producing a statistically significant difference were indicated.

\*p value < 0.05; \*\*p value < 0.01 by 1E and 2E versus 3E (comparison by Kruskal-Wallis test).

<sup>§</sup>p value < 0.05; <sup>§§</sup>p value < 0.01, 1E and 2E versus 5E (comparison by Kruskal-Wallis test).
