# Supplementary material for: Analysis of Human Gut Microbiota Composition Associated to the Presence of Commensal and Pathogen Microorganisms in Côte d’Ivoire
Source: MDPI journal article supplement (doi:10.3390/microorganisms9081763), 2021-08-18
Supplement: s1 [file s1]

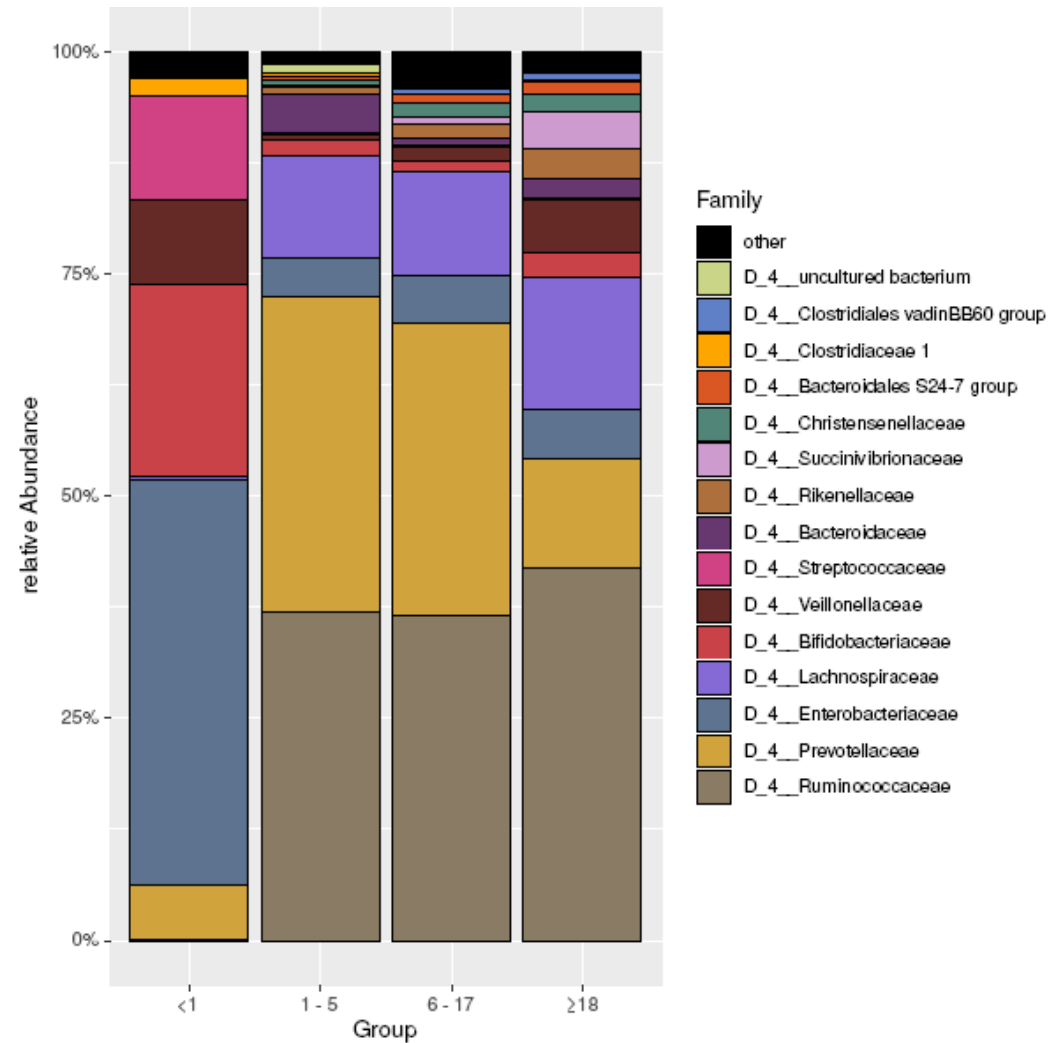

**Figure S1A.** The plot of top 15 bacterial relative abundances at the family level in each age group.

**Table S1A.** The top 15 bacterial relative abundances

| <b>Top15<br/>Genus abundance</b>             | <b>Age group (n)</b> | <b>&lt;1y (9)<br/>Median [min-max]</b> | <b>&lt;1y versus &gt;1 - 5y (16)<br/>p value</b> | <b>&lt;1y versus &gt;6 - 17y (36)<br/>p value</b> | <b>&lt;1y versus &gt;18y (15)<br/>p value</b> |
|----------------------------------------------|----------------------|----------------------------------------|--------------------------------------------------|---------------------------------------------------|-----------------------------------------------|
| <i>[Eubacterium] coprostanoligenes</i> group |                      | 0 [0-0]                                | 0.0138                                           | 0.0007                                            | 0.0006                                        |
| <i>[Eubacterium] rectale</i> group           |                      | 0 [0-0]                                | 0.0183                                           | 0.0091                                            | 0.0225                                        |
| <i>Bacteroides</i>                           |                      | 0 [0-0.0048]                           | 0.0171                                           | 0.0625                                            | 0.0362                                        |
| <i>Bifidobacterium</i>                       |                      | 0.0222 [0-0.8670]                      | 0.8661                                           | 1.0000                                            | 1.0000                                        |
| <i>Escherichia-Shigella</i>                  |                      | 0.00125 [0-0.720]                      | 0.3045                                           | 0.0512                                            | 0.0872                                        |
| <i>Faecalibacterium</i>                      |                      | 0 [0-0.0013]                           | 0.0005                                           | 0.0005                                            | 0.0362                                        |
| <i>Klebsiella</i>                            |                      | 0 [0-0.0160]                           | 0.0138                                           | 0.0030                                            | 0.0321                                        |
| <i>Lachnospiraceae</i> NK4A136 group         |                      | 0 [0-0]                                | 0.0016                                           | 0.0007                                            | 0.0036                                        |
| <i>Megasphaera</i>                           |                      | 0 [0-0,6535]                           | 1.0000                                           | 1.0000                                            | 1.0000                                        |
| <i>Prevotella 9</i>                          |                      | 0 [0-0.5423]                           | 0.0165                                           | 0.0026                                            | 0.2495                                        |
| <i>Roseburia</i>                             |                      | 0.0135 [0-0.0295]                      | 0.0029                                           | 0.0011                                            | 0.0170                                        |
| <i>Ruminococcaceae</i> UCG-002               |                      | 0 [0-0.0003]                           | 0.0165                                           | 0.0007                                            | 0.0006                                        |
| <i>Streptococcus</i>                         |                      | 0 [0-0.0073]                           | 0.5373                                           | 0.2866                                            | 0.3871                                        |
| <i>Subdoligranulum</i>                       |                      | 0 [0-0.008]                            | 0.0043                                           | 0.0007                                            | 0.0004                                        |
| <i>Veillonella</i>                           |                      | 0 [0-0.0158]                           | 0.4681                                           | 0.0606                                            | 0.1607                                        |

Comparison between the group <1 year and the other age groups, at the genus level.

p value by Kruskal Wallis test.

y means year
