# Supplementary material for: Analysis of Human Gut Microbiota Composition Associated to the Presence of Commensal and Pathogen Microorganisms in Côte d’Ivoire
Source: MDPI journal article supplement (doi:10.3390/microorganisms9081763), 2021-08-18
Supplement: s1 [file s1]

**Table S4A.** All microorganisms detected in the 5 symptomatic subjects

| Age (years) | Sex | Luminex panel pathogens<br><i>Blastocystis</i> and <i>Entamoeba</i> spp.                                               | Symptoms                 |
|-------------|-----|------------------------------------------------------------------------------------------------------------------------|--------------------------|
| 5           | F   | ETEC, <i>Shigella</i> , <i>G. duodenalis</i>                                                                           | Frequent abdominal pains |
| 8           | F   | <i>E.coli</i> O157, <i>G. duodenalis</i> , <i>Blastocystis</i>                                                         | Frequent abdominal pains |
| 6           | M   | <i>Campylobacter</i> , ETEC, adenovirus, enterovirus, <i>G.duodenalis</i> , <i>Blastocystis</i> , <i>En. hartmanni</i> | Frequent abdominal pains |
| 10          | F   | <i>E.coli</i> O157, ETEC, <i>G.duodenalis</i> , <i>Blastocystis</i> , <i>En. coli</i>                                  | Frequent abdominal pains |
| 5           | F   | <i>Campylobacter</i> , ETEC, <i>G.duodenalis</i> , <i>En. dispar</i>                                                   | Frequent abdominal pains |

Abbreviations: ETEC means enterotoxigenic *E. coli*

**Table S4B.** Comparison of *Blastocystis* groups: Alpha diversity index

| Alpha Diversity index \ Groups (n)<br>Median<br>[min-max] | Group 1 (8)<br>Control group | Group 2 (6)<br><i>Blastocystis</i><br>positive only | Group 3 (12)<br><i>Blastocystis</i> +<br><i>Entamoeba</i> spp. | Group 4a (5)<br><i>Blastocystis</i> +<br>virus +bacteria | Group 4b (6)<br><i>Blastocystis</i> +<br><i>Entamoeba</i> spp.<br>+virus+bacteria | Group 5b (13)<br><i>Blastocystis</i> +<br><i>Entamoeba</i> spp.<br>+virus+bacteria<br>+ <i>G. duodenalis</i> |
|-----------------------------------------------------------|------------------------------|-----------------------------------------------------|----------------------------------------------------------------|----------------------------------------------------------|-----------------------------------------------------------------------------------|--------------------------------------------------------------------------------------------------------------|
| Chao1                                                     | 150.70<br>[100.40-278.80]    | 217.60<br>[140.20-231.00]                           | 301.10<br>[126.60-454.70]*                                     | 154.20<br>[105.50-209.90] <sup>§</sup>                   | 300.30<br>[156.00-383.20]                                                         | 238.10<br>[172.00-610.00]                                                                                    |
| Observed OTUs                                             | 125.00<br>[82.00-201.00]     | 173.50<br>[117.00-189.00]                           | 248.00<br>[122.00-348.00]**                                    | 130.00<br>[94.00-170.00] <sup>§</sup>                    | 238.00<br>[141.00-290.00]                                                         | 189.00<br>[160.00-459.00]                                                                                    |
| Faith's Phylogenetic Diversity                            | 11.42<br>[8.457-15.23]       | 14.37<br>[11.460-25.67]                             | 21.80<br>[8.925-29.68]**                                       | 13.63<br>[7.372-15.67]                                   | 19.71<br>[15.940-23.98]*                                                          | 17.82<br>[11.360-34.15]*                                                                                     |
| Pielou's evenness                                         | 0.6546<br>[0.3435-0.7211]    | 0.6951<br>[0.5291-0.7336]                           | 0.7310<br>[0.4513-0.8301]*                                     | 0.5929<br>[0.4513-0.7169] <sup>§</sup>                   | 0.7243<br>[0.5304-0.7552]                                                         | 0.7282<br>[0.4092-0.8221]                                                                                    |
| Shannon                                                   | 3.138<br>[1.514-3.817]       | 3.586<br>[2.520-3.845]                              | 4.223<br>[3.699-4.589]**                                       | 3.045<br>[2.315-3.308] <sup>§§</sup>                     | 3.707<br>[2.939-4.282]                                                            | 3.770<br>[2.194-4.962]                                                                                       |

Group1: negative subjects; Group 2: positive only for *Blastocystis*; Group 3: positive for *Blastocystis* and *Entamoeba* spp.; Group 4a: positive for *Blastocystis* and pathogenic virus and bacteria; Group 4b: positive for *Blastocystis* and *Entamoeba* spp. and pathogenic virus and bacteria; Group 5b: positive for *Blastocystis* and *Entamoeba* spp. and *G. duodenalis* and pathogenic virus and bacteria.

\*means  $p < 0.05$ , \*\*means  $p < 0.01$ , in comparison of group 1 versus other groups.<sup>§</sup>means  $p < 0.05$ ,

<sup>§§</sup>means  $p < 0.01$ , in comparison of Group 4a versus Group 3 (Kruskal-Wallis test).

**Table S4C.** Comparison of *En. hartmanni* groups: Alpha diversity index

| Groups (n)<br>Median<br>[min-max]<br><br>Alpha Diversity<br>index | Control<br>group (8)        | <i>En. hartmanni</i><br>+ <i>Blastocystis</i> group (11) | <i>En. hartmanni</i> + <i>Blastocystis</i><br>+Pathogen group (9) |
|-------------------------------------------------------------------|-----------------------------|----------------------------------------------------------|-------------------------------------------------------------------|
| Chao1                                                             | 150.70<br>[100.40 – 278.80] | 271.90<br>[126.60 – 454.70]                              | 324.40<br>[172.00 – 547.60]                                       |
| Observed OTUs                                                     | 125.00<br>[82.00 – 201.00]  | 243.00<br>[122.00 – 336.00]                              | 258.00<br>[160.00 – 437.00]                                       |
| Faith's Phylogenetic<br>Diversity                                 | 11.42<br>[8.457 – 15.23]    | 21.39<br>[8.925 – 27.77]                                 | 21.62<br>[14.080 – 28.96]                                         |
| Pielou's evenness                                                 | 0.65<br>[0.3435 – 0.7211]   | 0.78<br>[0.6648 – 0.8355]                                | 0.73<br>[0.5304 – 0.8221]                                         |
| Shannon                                                           | 3.14<br>[1.514 – 3.817]     | 4.25<br>[3.699 – 4.589]                                  | 4.10<br>[2.939 – 4.833]                                           |

Control group versus Group of subjects positive for *En. hartmanni* and *Blastocystis*, and versus Group of subjects positive for *En. hartmanni* and *Blastocystis* and other pathogens.

\* means  $p < 0.05$  and \*\* means  $p < 0.01$  Control group versus *En. hartmanni* and *Blastocystis*; ° means  $p < 0.05$  and °° means  $p < 0.01$  Control group versus *En. hartmanni* and *Blastocystis* and pathogens; (Kruskal-Wallis test).

**Table S4D.** Comparison of *Entamoeba* species groups: Alpha diversity index

| Groups (n)<br>Median<br>[min-max]<br><br>Alpha<br>Diversity<br>index | Group 1E (8)<br>Control group | Group 2E (20)<br><i>Entamoeba</i> spp.<br>Negative<br>+Pathogens | Group 3E (10)<br><i>En. coli</i><br>+Pathogens | Group 4E (2)<br><i>En. dispar</i><br>+Pathogens | Group 5E (9)<br><i>En. hartmanni</i><br>+Pathogens |
|----------------------------------------------------------------------|-------------------------------|------------------------------------------------------------------|------------------------------------------------|-------------------------------------------------|----------------------------------------------------|
| Chao1                                                                | 150.70<br>[100.40–278.80]     | 193.60<br>[105.50–356.70]                                        | 228.80<br>[98.60–610.00]                       | 151.10<br>[118.10–184.10]                       | 324.40<br>[172.00–547.60]*                         |
| Observed OTUs                                                        | 125.00<br>[82.00–201.00]      | 148.50<br>[79.00–324.00] <sup>§</sup>                            | 188.00<br>[95.00–459.00]                       | 136.50<br>[111.00–162.00]                       | 258.00<br>[160.00–437.00]* <sup>§</sup>            |
| Faith's<br>Phylogenetic<br>Diversity                                 | 11.42<br>[8.457–15.23]        | 13.23<br>[7.341–26.59] <sup>§</sup>                              | 17.79<br>[7.271–34.15]                         | 12.66<br>[11.360–13.95]                         | 21.62<br>[14.080–28.96]** <sup>§</sup>             |
| Pielou's evenness                                                    | 0.6546<br>[0.3435–0.7211]     | 0.7016<br>[0.4513–0.8301]                                        | 0.7243<br>[0.4092–0.8095]                      | 0.5906<br>[0.4952–0.6860]                       | 0.7299<br>[0.5304–0.8221]                          |
| Shannon                                                              | 3.138<br>[1.514–3.817]        | 3.314<br>[2.234–4.562]                                           | 3.604<br>[2.194–4.962]                         | 2.911<br>[2.332–3.490]                          | 4.105<br>[2.939–4.833]                             |

Groups 1E (negatives) versus other groups. Group 1E: negative subjects; Group: 2E: positive for pathogens not including *Entamoeba* spp.; Group 3E: subjects positive for *En. coli* and other pathogens; Group 4E: subjects positive *En. dispar* and other pathogens; Group 5E: subjects positive for *En. hartmanni* and other pathogens.

\* means  $p < 0.05$ , \*\* means  $p < 0.01$  in comparison the groups 1E versus 5E; <sup>§</sup> means  $p < 0.05$  in comparison of group 2E versus group 5E (Kruskal-Wallis test).

**S4 TableE.** Comparison of *G. duodenalis* and other intestinal pathogens positives: Alpha diversity index

| Alpha diversity index \ Groups (n)<br>Median<br>[min-max] | Group A (8)<br>Control group | Group D (11)<br><i>Blastocystis</i> and<br><i>E. hartmanni</i><br>w/o pathogens | Group M (5)<br>Bacteria and viruses<br>w/o <i>G. duodenalis</i><br>w/o <i>Entamoeba</i> spp. |
|-----------------------------------------------------------|------------------------------|---------------------------------------------------------------------------------|----------------------------------------------------------------------------------------------|
| Chao1                                                     | 150.70<br>[100.40–278.80]    | 271.90<br>[126.60–454.70]                                                       | 154.20<br>[105.50–209.90]                                                                    |
| Observed OTUs                                             | 125.00<br>[82.00–201.00]*    | 243.00<br>[122.00–336.00]                                                       | 130.00<br>[94.00–170.00]                                                                     |
| Faith's Phylogenetic<br>Diversity                         | 11.42<br>[8.457–15.23]*      | 21.39<br>[8.925–27.77]                                                          | 13.63<br>[7.372–15.67]                                                                       |
| Shannon                                                   | 3.138<br>[1.514–3.817]*      | 4.254<br>[3.699–4.589] <sup>§</sup>                                             | 3.045<br>[2.315–3.308]                                                                       |

Only groups with a statistically significant difference were indicated.

Groups A: negative subjects; Groups Groups D: positive for *Blastocystis* and *En. hartmanni* without other pathogens; Groups M: positive for *Blastocystis* and mixed infection of pathogenic bacteria and viruses, without *G. duodenalis* and *Entamoeba* spp..

\* means  $p < 0.05$ ; A versus D; <sup>§</sup> means  $p < 0.05$  D versus M. (Kruskal-Wallis test)  
w/o means without.
