# Supplementary material for: Analysis of Human Gut Microbiota Composition Associated to the Presence of Commensal and Pathogen Microorganisms in Côte d’Ivoire
Source: MDPI journal article supplement (doi:10.3390/microorganisms9081763), 2021-08-18
Supplement: s1 [file s1]

**Table S3A** Alpha diversity indices of positive and negative subjects, grouped in <1year and >1year.

| <b>Variables</b>                              | <b>&lt;1year</b> | <b>Median<br/>[min—max]</b> | <b>p value</b> | <b>&gt;1year</b> | <b>Median<br/>[min—max]</b> | <b>p value</b> |
|-----------------------------------------------|------------------|-----------------------------|----------------|------------------|-----------------------------|----------------|
| <b>Patients<br/>(number)</b>                  | Negative (4)     | 0.10<br>[0.02—0.17]         | 0.1271         | Negative (8)     | 9.00<br>[3.00—30.00]        | 0.6389         |
|                                               | Positive (5)     | 0.25<br>[0.10—0.75]         |                | Positive (59)    | 10.00<br>[1.80—59.00]       |                |
| <b>Chao1 index</b>                            | Negative (4)     | 30.25<br>[19.00—49.27]      | 0.1462         | Negative (8)     | 150.70<br>[100.40—278.80]   | 0.0087         |
|                                               | Positive (5)     | 67.00<br>[20.00—95.07]      | 0.1462         | Positive (59)    | 221.50<br>[98.60—610.00]    |                |
| <b>Observed<br/>OTUs</b>                      | Negative (4)     | 30.00<br>[19.00—46.00]      | 0.2359         | Negative (8)     | 125.00<br>[82.00—201.00]    | 0.0037         |
|                                               | Positive (5)     | 46.00<br>[20.00—86.00]      | 0.2359         | Positive (59)    | 179.00<br>[79.00—459.00]    |                |
| <b>Faith's<br/>phylogenetic<br/>diversity</b> | Negative (4)     | 2.259<br>[0.9572—12.040]    | 0.8066         | Negative (8)     | 11.42<br>[8.457—15.23]      | 8.005E-05      |
|                                               | Positive (5)     | 4.654<br>[2.7080—8.697]     | 0.8066         | Positive (59)    | 16.17<br>[7.271—34.15]      |                |
| <b>Pielou's<br/>evenness</b>                  | Negative (4)     | 0.5158<br>[0.3748—0.6605]   | 0.7370         | Negative (8)     | 0.6546<br>[0.3435—0.7211]   | 0.1752         |
|                                               | Positive (5)     | 0.5549<br>[0.1764—0.6777]   | 0.7370         | Positive (59)    | 0.7239<br>[0.4092—0.8355]   |                |
| <b>Shannon<br/>index</b>                      | Negative (4)     | 1.569<br>[1.3800—2.420]     | 0.8576         | Negative (8)     | 3.138<br>[1.514—3.817]      | 0.0760         |
|                                               | Positive (5)     | 1.887<br>[0.6059—3.019]     | 0.8576         | Positive (59)    | 3.636<br>[2.194—4.962]      |                |

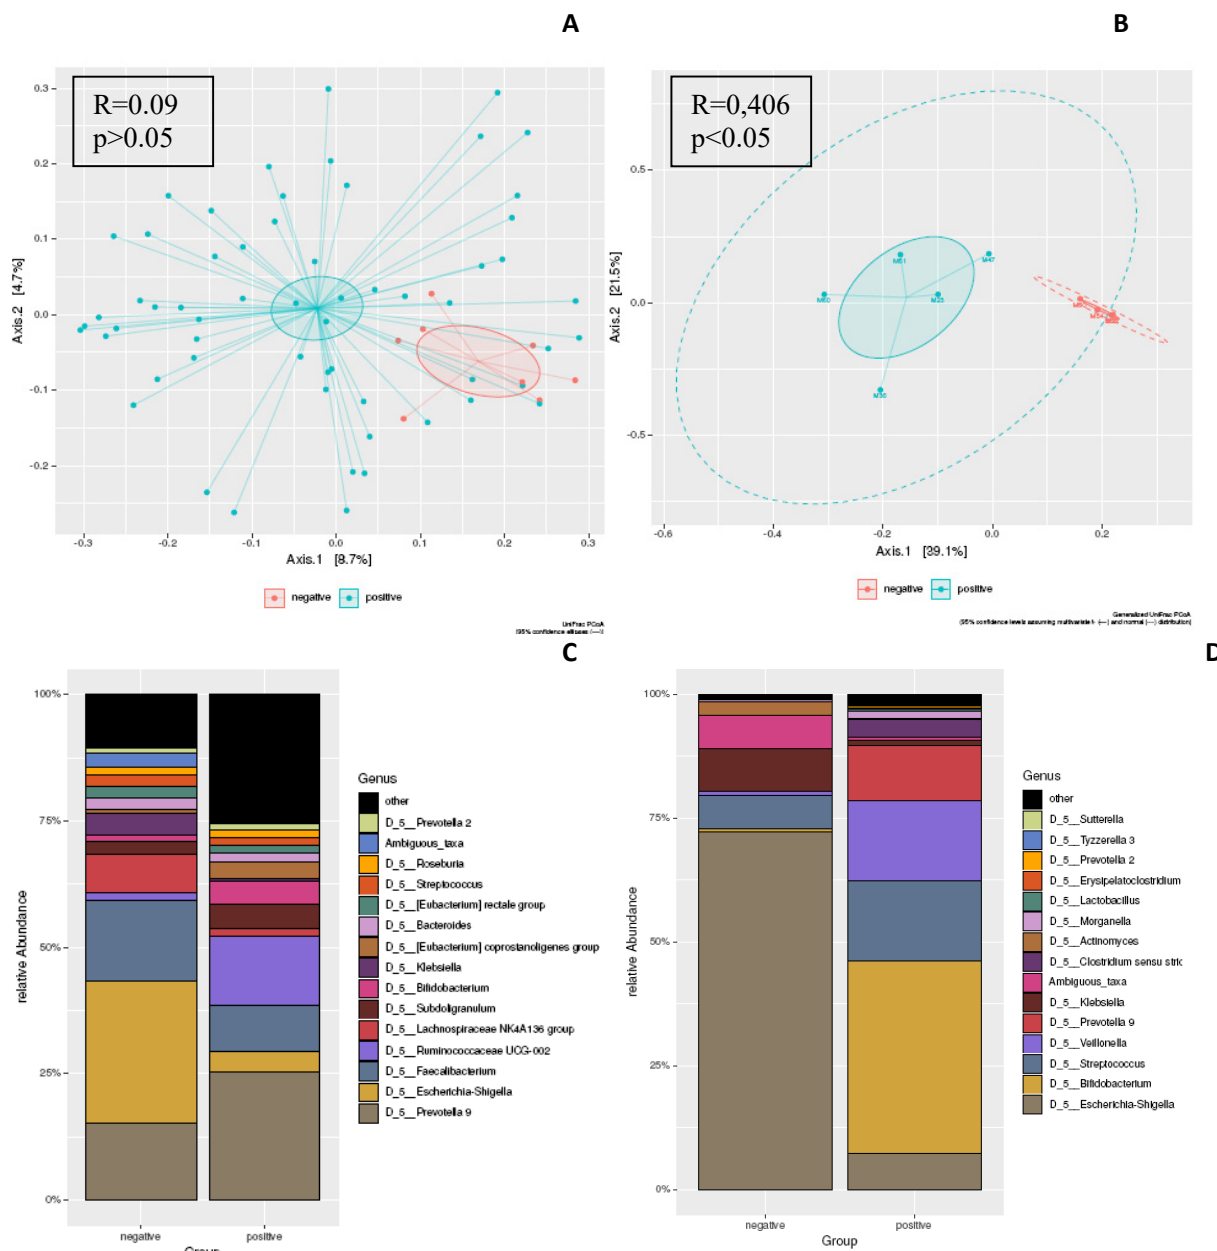

**Figure S3.** Positive versus negative subjects comparisons: Beta diversity analysis.

(S3 FigA): The UniFrac distances between positive (n=59) and negative (n=8) subjects (>1 year) using principal coordinate analysis (PCoA). (S3 FigB) The UniFrac distances between positive(n=5) and negative (n=4) subjects (< 1 year). (S3 FigC) The plot of top 15 relative bacterial abundances at the Genus level, showing a diversity of positive versus negative in > 1 year subjects (S3 FigD) The plot of top 15 relative bacterial abundances at the genus level, showing a diversity of positive versus negative in <1 year subjects.
